# Supplementary material
Source: PubMed Central journal article supplement (PMC6588399)
Supplement: NIHMS1523941-supplement-2.pdf [file NIHMS1523941-supplement-2.pdf]

**Supplementary Table 1: List of patient tissue information and experimental analyses performed.**

| Sample No. | Patient ID | Source | Clinical diagnosis    | Age of diagnosis or sampling | Race/Gender | Region      |
|------------|------------|--------|-----------------------|------------------------------|-------------|-------------|
| 1          | 90015      | VABBB  | CTL                   | 66                           | UN/M        | SC-T & OCCL |
| 2          | 100036     | VABBB  | CTL                   | 56                           | UN/M        | SC-T & OCCL |
| 3          | 110005     | VABBB  | CTL                   | 62                           | UN/M        | SC-T & OCCL |
| 4          | 110006     | VABBB  | CTL                   | 68                           | UN/M        | SC-T        |
| 5          | 110023     | VABBB  | CTL                   | N/A                          | N/A         | SC-T        |
| 6          | 120016     | VABBB  | CTL                   | 63                           | UN/F        | SC-T        |
| 7          | 90003      | VABBB  | fALS                  | 73                           | W/M         | SC-T & OCCL |
| 8          | 100007     | VABBB  | fALS/FTD*-C9orf72 HRE | 61                           | W/M         | SC-T & OCCL |
| 9          | 100038     | VABBB  | ALS                   | 57                           | B/M         | SC-T & OCCL |
| 10         | 110010     | VABBB  | fALS-PFN1 G118V       | 55                           | W/M         | SC-T & OCCL |
| 11         | 120015     | VABBB  | ALS/FTD*              | 58                           | W/M         | SC-T & OCCL |
| 12         | 90005      | VABBB  | ALS                   | 65                           | W/M         | SC-T        |
| 13         | 90020      | VABBB  | fALS-SOD1 L145F       | 49                           | W/F         | SC-T        |
| 14         | 100002     | VABBB  | ALS                   | 63                           | W/M         | SC-T        |
| 15         | 100039     | VABBB  | fALS-C9orf72 HRE      | 50                           | W/M         | SC-T        |
| 16         | 100040     | VABBB  | ALS                   | 88                           | W/M         | SC-T        |
| 17         | 993        | JHMI   | CTL                   | 66                           | W/M         | IP          |
| 18         | 989        | JHMI   | CTL                   | 59                           | M/M         | IP          |
| 19         | 1058       | JHMI   | CTL                   | 70                           | W/M         | IP          |
| 20         | 2317       | JHMI   | CTL                   | 65                           | B/M         | IP          |
| 21         | 2242       | JHMI   | AD                    | 62                           | W/M         | IP          |
| 22         | 2260       | JHMI   | AD                    | 78                           | W/F         | IP          |
| 23         | 2273       | JHMI   | AD                    | 62                           | W/F         | IP          |
| 24         | 2277       | JHMI   | AD                    | 63                           | W/F         | IP          |
| 25         | 2376       | JHMI   | AD                    | 61                           | W/M         | IP          |
| 26         | 2417       | JHMI   | AD                    | 61                           | W/F         | IP          |
| 27         | 2430       | JHMI   | AD                    | 62                           | UN/F        | IP          |

Abbreviations: ALS (amyotrophic lateral sclerosis), fALS (familial amyotrophic lateral sclerosis), FTD\* (frontotemporal dementia-like pathology), HRE (hexanucleotide repeat expansion), AD (alzheimer's disease), CTL (control), UN (unknown), W (white), M (male), F (female), B (black), N/A (not applicable), JHMI (Johns Hopkins Medical Institute), VABBB (VA biorepository brain bank), SC-T (Spinal cord-Thoracic), OCCL (occipital lobe), IP (inferior parietal cortex).

## Supplementary Table 2. *C.elegans* strains

| Strains | Allele                      | Genotype                                                              | Source                                   |
|---------|-----------------------------|-----------------------------------------------------------------------|------------------------------------------|
| IW07    | <i>iwls25</i>               | <i>Psnb-1::SOD1-WT</i>                                                | Wang lab (Wang et al., 2009)             |
| IW5     | <i>iwls10</i>               | <i>Psnb-1::SOD1-G85R</i>                                              | Wang lab (Wang et al., 2009)             |
| IW8     | <i>iwls8</i>                | <i>Psnb-1::SOD1-G85R-YFP</i>                                          | Wang lab (Wang et al., 2009)             |
| IW377   | <i>iwls10;iw139</i>         | <i>Psnb-1::SOD1-G85R; lin-61(H479Y)</i>                               | Wang lab                                 |
| MT12833 | <i>n3809</i>                | <i>lin-61(Q159Ochre)</i>                                              | CGC (Harrison et al., 2007)              |
| IW446   | <i>iwls10;n3809</i>         | <i>Psnb-1::SOD1-G85R; lin-61(Q159Ochre)</i>                           | Wang lab                                 |
| IW445   | <i>iwls8;n3809</i>          | <i>Psnb-1::SOD1-G85R-YFP; lin-61(Q159Ochre)</i>                       | Wang lab                                 |
| IW446   | <i>iwls25;n3809</i>         | <i>Psnb-1::SOD1-WT; lin-61(Q159Ochre)</i>                             | Wang lab                                 |
| AM716   | <i>rmls284</i>              | <i>PF25B3.3::Q(67)-YFP</i>                                            | Richard Morimoto (Brignull et al., 2006) |
| IW777   | <i>rmls284;n3809</i>        | <i>PF25B3.3::Q(67)-YFP; lin-61(Q159Ochre)</i>                         | This study                               |
| YD12    | <i>xzEx12</i>               | <i>PF25B3.3::UbG76V-Dendra2</i>                                       | C. Holmberg (Hamer et al., 2010)         |
|         | <i>xzEx12; n3809</i>        | <i>PF25B3.3::UbG76V-Dendra2; lin-61(Q159Ochre)</i>                    | This study                               |
|         | <i>xzEx12; iwls10;n3809</i> | <i>PF25B3.3::UbG76V-Dendra2; Psnb-1::SOD1-G85R; lin-61(Q159Ochre)</i> | This study                               |
| CB4856  | Hawaiian strain             | Wild-type                                                             | CGC                                      |

### References:

- Brignull, H.R., Moore, F.E., Tang, S.J., and Morimoto, R.I. (2006). Polyglutamine proteins at the pathogenic threshold display neuron-specific aggregation in a pan-neuronal *Caenorhabditis elegans* model. *J Neurosci* 26, 7597-7606.
- Hamer, G., Matilainen, O., and Holmberg, C.I. (2010). A photoconvertible reporter of the ubiquitin-proteasome system in vivo. *Nature methods* 7, 473-478.
- Harrison, M.M., Lu, X., and Horvitz, H.R. (2007). LIN-61, one of two *Caenorhabditis elegans* malignant-brain-tumor-repeat-containing proteins, acts with the DRM and NuRD-like protein complexes in vulval development but not in certain other biological processes. *Genetics* 176, 255-271.
- Wang, J., Farr, G., Hall, D., Li, F., Furtak, K., Dreier, L., and Horwich, A. (2009). An ALS-linked mutant SOD1 produces a locomotor defect associated with aggregation and synaptic dysfunction when expressed in neurons of *Caenorhabditis elegans*. *PLoS Genet* 5, e1000350.
